# Supplementary material
Source: Research Square preprint supplement (doi:10.21203/rs.3.rs-10016385/v1)
Supplement: Supplementary file 1 [file ad8b1c96df9d66b9e6ab8d65.docx]

# Occurrence, fate, removal efficiency and ecological risk of selected antibiotics in wastewater and surface water of some hospitals: A case study in Vietnam

Hung Nguyen Xuana*; Thuy Le Minha; Nam Vu Duca; Tung Nguyen Ngoca; Nhan Le Vana; Trung Nguyen Quangb; Tuan Nguyen Anhc.

a High Technology Innovation Center, Vietnam Academy Science and Technology, No. 18 Hoang Quoc Viet, Nghia Do, Hanoi, Vietnam.

b Institute of Environmental Science and Public Health, No. 18 Hoang Quoc Viet Street, Nghia Do, Hanoi, Vietnam

c Centre for Community Capacity Development Nhan Van, No. 199 Trung Kinh Street, Yen Hoa, Hanoi, Vietnam

# Appendix A. Supplementary data

*Table S1: Mass; Standard curve, MDL, LOQ of analytical method*

| **TT** | **Compounds** | **Mass** | **RT**  **(min)** | **Standard curve** | **R2** | **MDL** | **LOQ** |
| --- | --- | --- | --- | --- | --- | --- | --- |
| **ng/L** | |
| 1 | Ciprofloxacin | 332.1405 [M+H]+ | 9.53 | Y = 3,118E7*X – 2,756E5 | 0.9993 | 0.067 | 0.222 |
| 2 | Levofloxacin | 362.1511 [M+H]+ | 9.33 | Y = 7,103E7*X – 3,551E5 | 0.9975 | 0.066 | 0.219 |
| 3 | Moxifloxacin | 402.1824 [M+H]+ | 10.08 | Y = 1,162E8*X – 4,954E5 | 0.9988 | 0.036 | 0.121 |
| 4 | Clarithromycin | 748.4842 [M+H]+ | 13.02 | Y = 4,169E7*X + 2,543E6 | 0.9998 | 0.069 | 0.230 |
| 5 | Amoxicillin | 398.1380 [M+CH3]+ | 8.60 | Y = 3,316E6*X + 2,956E4 | 0.9996 | 0.032 | 0.107 |
| 6 | Cephalexin | 148.1012 [M+H]+ | 9.56 | Y = 1,900E6*X + 1,042E4 | 0.9997 | 0.031 | 0.103 |

Table S2: Average concentration of antibiotics in wastewater, treated waster

and surface waster at H1 hospital

| TT | Compounds | BW | AW | EW 1 | EW 2 | EW 3 | EW 4 | EW 5 |
| --- | --- | --- | --- | --- | --- | --- | --- | --- |
| ng/L | | | | | | |
| 1 | Amoxicillin | 47.8 | 6.68 | 0.503 | 0.124 | N.D | N.D | N.D |
| 2 | Cephalexin | 2163 | 587 | 23.9 | 5.54 | 3.00 | 6.78 | 2.40 |
| 3 | Ciprofloxacin | 1360 | 197.4 | 11.9 | 31.4 | 20.8 | 16.9 | 13.4 |
| 4 | Clarithromycin | 46.4 | 7.11 | 0.267 | 0.479 | 0.576 | 0.156 | 0.650 |
| 5 | Levofloxacin | 541 | 321 | 5.75 | 6.36 | 0.792 | 8.50 | 4.60 |
| 6 | Moxifloxacin | 241 | 91.6 | 0.339 | N.D | N.D | N.D | N.D |

Table S3: Average concentration of antibiotics in wastewater, treated waster

and surface waster at H2 hospital

| TT | Compounds | BW | AW | EW 1 | EW 2 | EW 3 | EW 4 | EW 5 |
| --- | --- | --- | --- | --- | --- | --- | --- | --- |
| ng/L | | | | | | |
| 1 | Amoxicillin | 55.8 | 11.6 | N.D | N.D | N.D | N.D | N.D |
| 2 | Cephalexin | 3603 | 1260 | 63.0 | 3.15 | 0.17 | N.D | N.D |
| 3 | Ciprofloxacin | 3506 | 479 | 23.4 | 37.6 | 18.2 | 42.8 | 32.2 |
| 4 | Clarithromycin | 27.5 | 4.21 | N.D | N.D | 1.24 | N.D | N.D |
| 5 | Levofloxacin | 1476 | 897 | 11.6 | 18.4 | N.D | 10.1 | 13.6 |
| 6 | Moxifloxacin | 850 | 322 | N.D | N.D | N.D | N.D | N.D |

Table S4: Average concentration of antibiotics in wastewater, treated waster

and surface waster at H3 hospital

| TT | Compounds | BW | AW | EW 1 | EW 2 | EW 3 | EW 4 | EW 5 |
| --- | --- | --- | --- | --- | --- | --- | --- | --- |
| ng/L | | | | | | |
| 1 | Amoxicillin | 28.3 | N.D | N.D | N.D | N.D | 1.47 | 0.54 |
| 2 | Cephalexin | 1130 | N.D | 177.7 | N.D | N.D | N.D | N.D |
| 3 | Ciprofloxacin | 4634 | 99.6 | 69.5 | N.D | 2.28 | 3.28 | N.D |
| 4 | Clarithromycin | 1.67 | N.D | N.D | N.D | N.D | N.D | 0.222 |
| 5 | Levofloxacin | 2476 | 0.206 | 33.8 | 0.124 | 0.498 | 0.771 | 0.682 |
| 6 | Moxifloxacin | 24.7 | N.D | 94.3 | N.D | N.D | N.D | N.D |

Table S5: Average concentration of antibiotics in wastewater, treated waster

and surface waster at H4 hospital

| TT | Compounds | BW | AW | EW 1 | EW 2 | EW 3 | EW 4 | EW 5 |
| --- | --- | --- | --- | --- | --- | --- | --- | --- |
| ng/L | | | | | | |
| 1 | Amoxicillin | 9.66 | N.D | N.D | N.D | N.D | N.D | N.D |
| 2 | Cephalexin | 5041 | N.D | 187 | 174 | 114 | 72.7 | 101 |
| 3 | Ciprofloxacin | 1775 | 15.4 | 0.953 | 23.1 | 4.59 | 1.28 | 1.43 |
| 4 | Clarithromycin | 2.86 | N.D | N.D | 0.420 | N.D | 0.893 | N.D |
| 5 | Levofloxacin | 1092 | 88.9 | 1.25 | 28.0 | 3.70 | 4.50 | 0.899 |
| 6 | Moxifloxacin | 453 | 0.125 | N.D | 0.246 | 0.225 | N.D | N.D |

BW: Hospital wastewater; AW: Treated water; EW: Surface Water; N.D = not detected

|  | Table S6: Average concentration of antibiotics in surface waster | | | | | | | | | | |
| --- | --- | --- | --- | --- | --- | --- | --- | --- | --- | --- | --- |
| TT | Compouns | H1 | | H2 | | H3 | | H4 | Mean | | |
| ng/L | | | | | | | | | |
| 1 | Amoxicillin | 0.125 | | n.d | | 0.402 | | n.d | 0.176±0.206 | | |
| 2 | Cephalexin | 8.32 | | 13.3 | | 3.54 | | 13.0 | 9.53±4.59 | | |
| 3 | Clarithromycin | 0.426 | | 0.248 | | nd | | 0.438 | 0.370±0.106 | | |
| 4 | Ciprofloxacin | 18.9 | | 30.8 | | 15.0 | | 6.27 | 17.8±10.2 | | |
| 5 | Levofloxacin | 5.20 | | 10.7 | | 1.09 | | 7.67 | 6.18±4.08 | | |
| 6 | Moxifloxacin | 0.085 | | n.d | | 1.89 | | 0.094 | 0.688±1.04 | | |
| Table S7: RQs of antibiotics in surface water in hospitals | | | | | | | | | | | |
| Compounds | | | | H1 | | H2 | | H3 | | | H4 |
| Amoxicillin | | | | 0.157 | | - | | 0.503 | | | - |
| Cephalexin | | | | 0.001 | | 0.002 | | 0.002 | | | 0.001 |
| Ciprofloxacin | | | | 1.888 | | 3.084 | | 2.502 | | | 0.627 |
| Clarithromycin | | | | 0.043 | | 0.124 | | 0.022 | | | 0.066 |
| Levofloxacin | | | | 0.520 | | 1.343 | | 0.109 | | | 0.767 |
| Moxifloxacin | | | | 9.97E-07 | | 0.00E+00 | | 2.77E-05 | | | 6.93E-07 |
| **Total RQs** | | | | **2.61** | | **4.55** | | **3.14** | | | **1.46** |


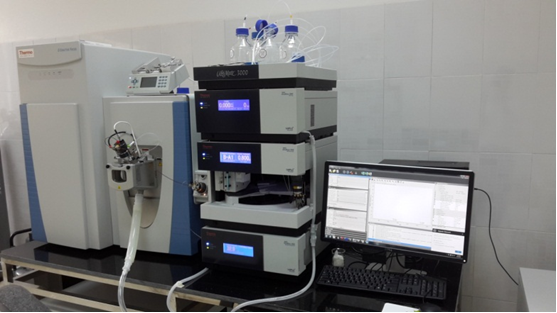
Figure S1: Ultra Performance Liquid Chromatography coupled with High-Resolution Mass Spectrometry: Q Extractive Focus


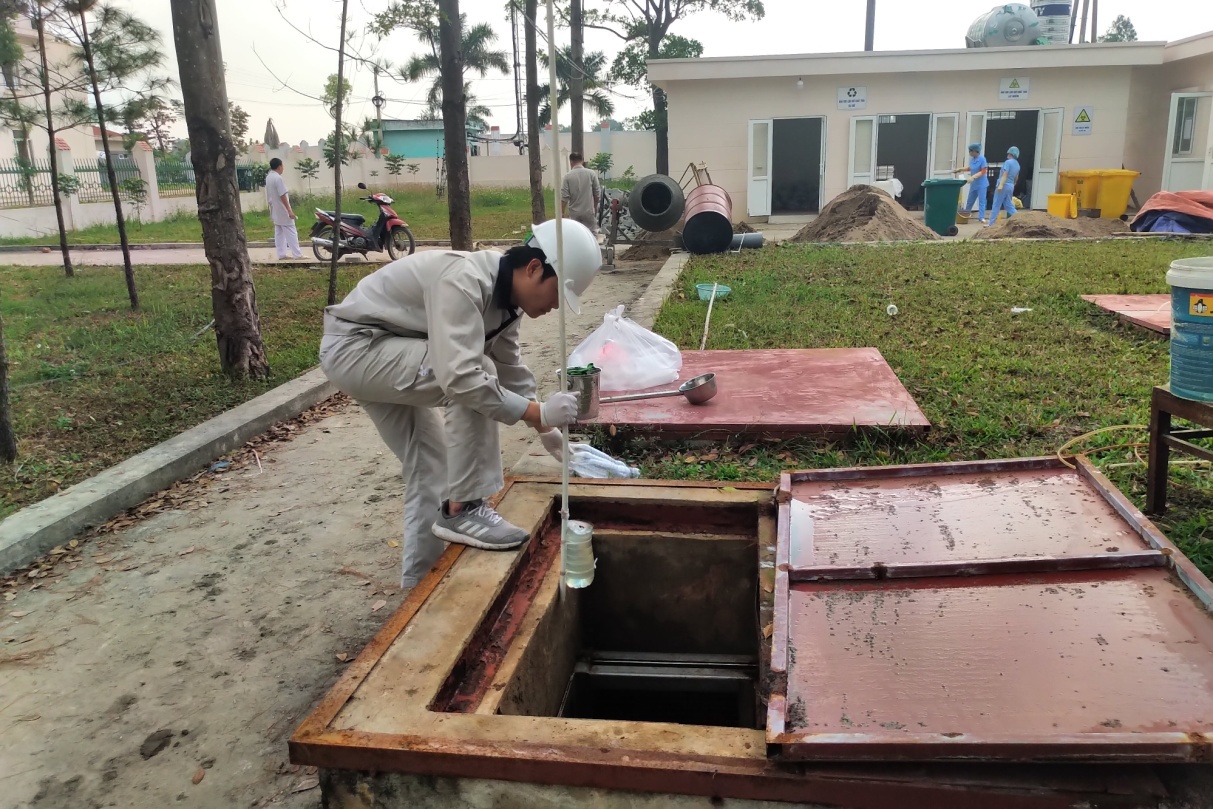


Figure S2: Sampling hospital wastewater sample


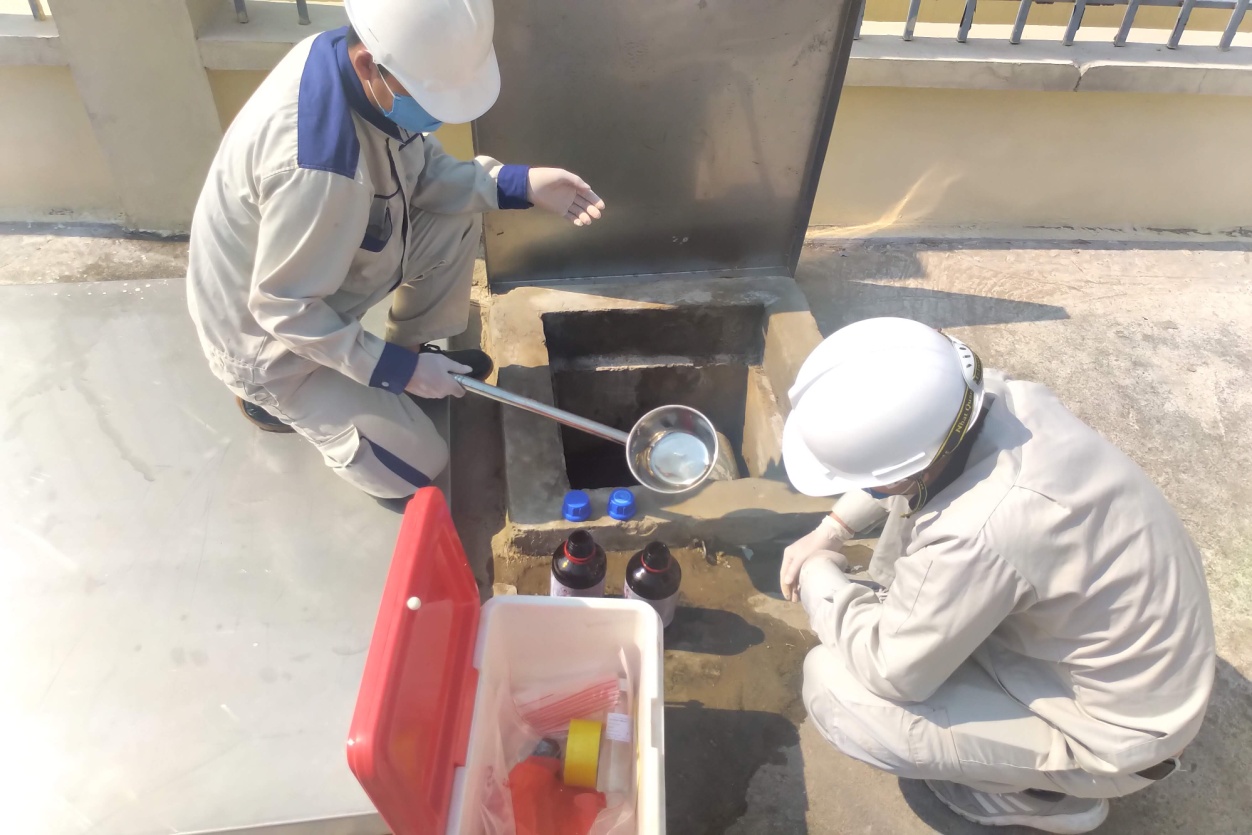


Figure S3: Sampling treated wastewater sample


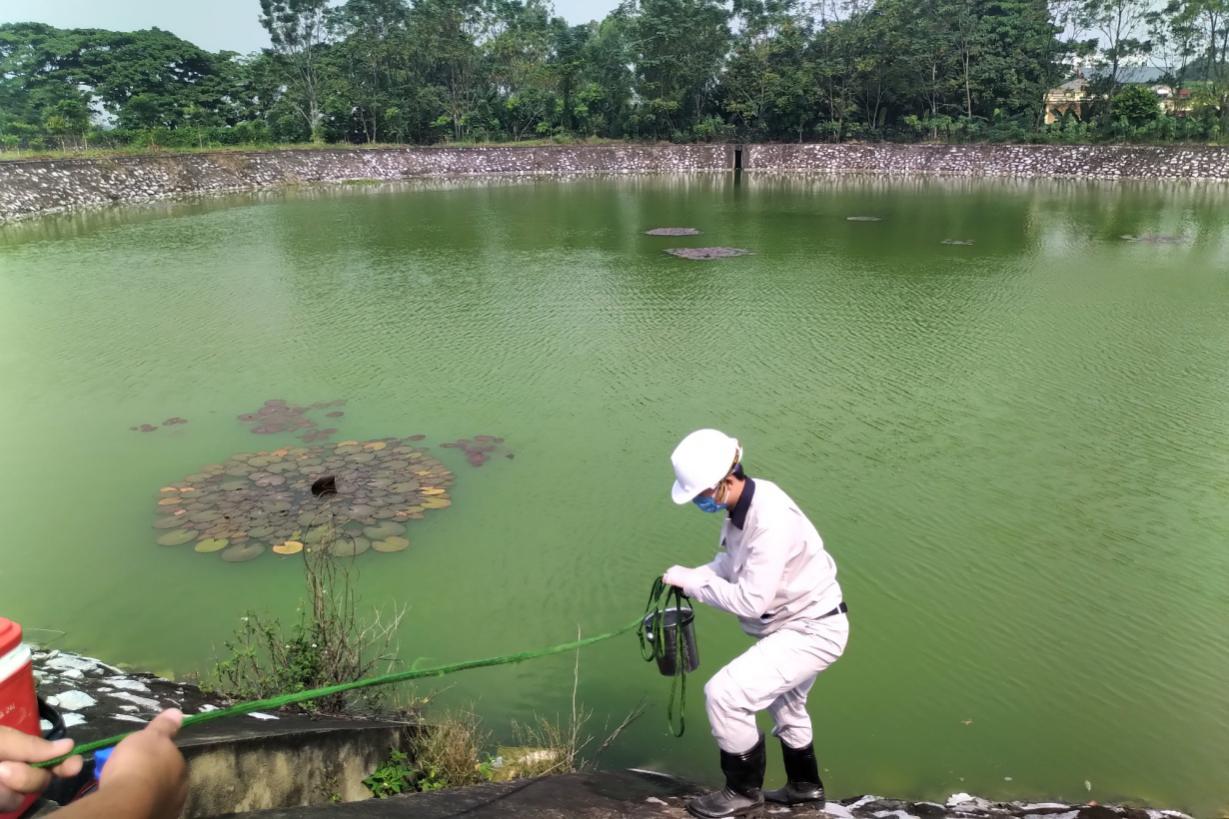


Figure S4: Sampling surface water sample


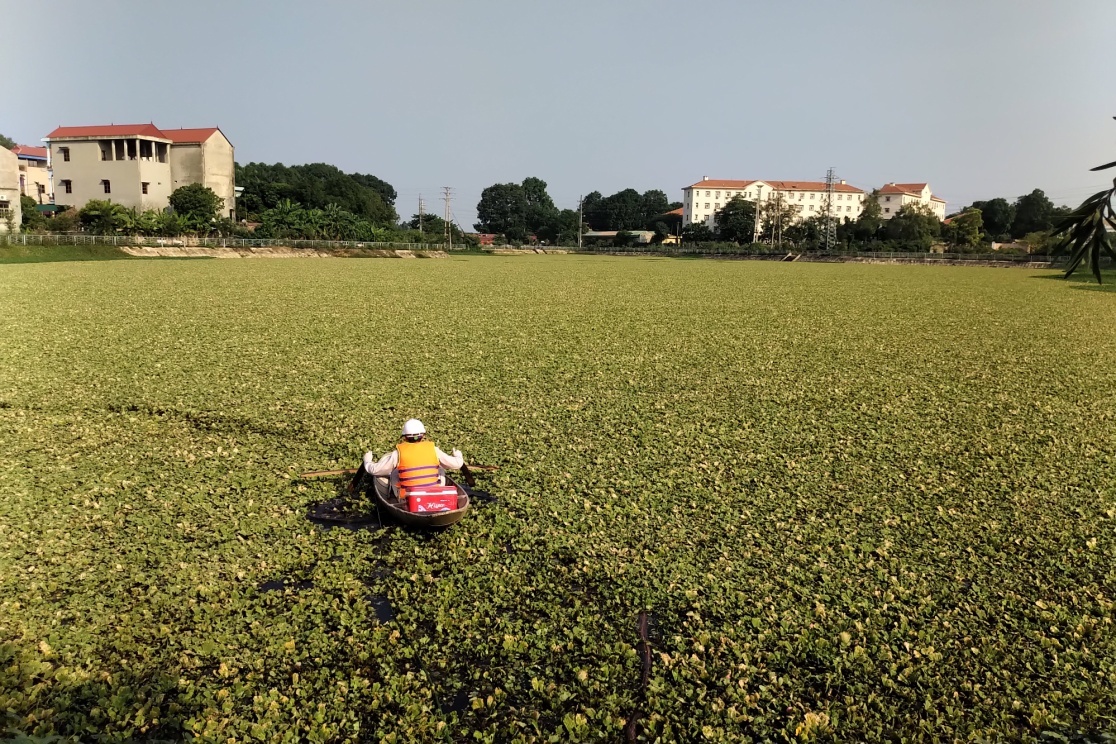


Figure S5: Sampling surface water sample
